# Supplementary material for: Red and Processed Meat, Poultry, Fish, and Egg Intakes and Cause-Specific and All-Cause Mortality among Men with Nonmetastatic Prostate Cancer in a U.S. Cohort
Source: Oxford University Press journal article supplement (doi:10.1158/1055-9965.epi-19-1426), 2020-03-04
Supplement: 10559965epi191426-sup-232373_2_supp_6065419_q54fpc.docx [file 10559965epi191426-sup-232373_2_supp_6065419_q54fpc.docx]

| **Supplemental** **Table 4. Relative risks and 95% confidence intervals for post-diagnosis meat and egg intakes and prostate cancer-specific mortality (PCSM) and all-cause mortality among 3,344 men with non-metastatic prostate cancer and no history of cardiovascular disease in the CPS-II Nutrition Cohorta** | | | | | |
| --- | --- | --- | --- | --- | --- |
|  | **Quartile of intakeb** | | | |  |
|  | **Q1** | **Q2** | **Q3** | **Q4** | ***P*-trend** |
| **Total red and processed meat, median (servings/wk)** | 2.0 | 3.8 | 5.7 | 9.7 |  |
| PCSM |  |  |  |  |  |
| Deaths/person years | 56/8,259 | 55/9,084 | 71/8,675 | 75/8,991 |  |
| Multivariable modelc | 1.00 (-) | 0.87 (0.58, 1.30) | 1.17 (0.79, 1.74) | 1.00 (0.65, 1.52) | 0.8 |
| All-cause mortality |  |  |  |  |  |
| Deaths/person years | 367/8,259 | 448/9,084 | 414/8,675 | 480/8,991 |  |
| Multivariable modelc | 1.00 (-) | 1.11 (0.95, 1.28) | 1.08 (0.92, 1.27) | 1.13 (0.95, 1.33) | 0.31 |
| **Unprocessed red meat, median (servings/wk)** | 1.1 | 2.0 | 2.9 | 5.5 |  |
| PCSM |  |  |  |  |  |
| Deaths/person years | 59/7,290 | 65/9,206 | 70/9,086 | 63/9,426 |  |
| Multivariable modelc | 1.00 (-) | 0.77 (0.53, 1.13) | 0.82 (0.55, 1.22) | 0.60 (0.39, 0.93) | 0.03 |
| All-cause mortality |  |  |  |  |  |
| Deaths/person years | 365/7,290 | 415/9,206 | 454/9,086 | 475/9,426 |  |
| Multivariable modelc | 1.00 (-) | 0.88 (0.76, 1.03) | 1.00 (0.85, 1.17) | 0.95 (0.80, 1.13) | 0.84 |
| **Processed meat, median (servings/wk)** | 0.6 | 1.3 | 2.2 | 5.1 |  |
| PCSM |  |  |  |  |  |
| Deaths/person years | 56/8,213 | 52/8,460 | 70/9,340 | 79/8,995 |  |
| Multivariable modelc | 1.00 (-) | 1.07 (0.71, 1.62) | 1.17 (0.78, 1.76) | 1.21 (0.80, 1.83) | 0.39 |
| All-cause mortality |  |  |  |  |  |
| Deaths/person years | 364/8,213 | 397/8,460 | 472/9,340 | 476/8,995 |  |
| Multivariable modelc | 1.00 (-) | 1.13 (0.97, 1.31) | 1.12 (0.96, 1.31) | 1.11 (0.95, 1.31) | 0.48 |
| **Poultry, median (servings/wk)** | 0.6 | 1.1 | 1.6 | 4.0 |  |
| PCSM |  |  |  |  |  |
| Deaths/person years | 54/6,955 | 66/8,264 | 75/10,373 | 62/9,416 |  |
| Multivariable modelc | 1.00 (-) | 0.99 (0.67, 1.46) | 1.16 (0.78, 1.71) | 1.06 (0.70, 1.60) | 0.85 |
| All-cause mortality |  |  |  |  |  |
| Deaths/person years | 403/6,955 | 383/8,264 | 517/10,373 | 406/9,416 |  |
| Multivariable modelc | 1.00 (-) | 0.86 (0.74, 0.99) | 0.99 (0.86, 1.14) | 0.88 (0.75, 1.02) | 0.22 |
| **Unprocessed poultry, median (servings/wk)** | 0.5 | 0.6 | 1.0 | 3.0 |  |
| PCSM |  |  |  |  |  |
| Deaths/person years | 60/7,970 | 34/4,674 | 101/11,767 | 62/10,597 |  |
| Multivariable modelc | 1.00 (-) | 1.12 (0.73, 1.74) | 1.15 (0.81, 1.63) | 0.90 (0.61, 1.33) | 0.28 |
| All-cause mortality |  |  |  |  |  |
| Deaths/person years | 452/7,970 | 231/4,674 | 566/11,767 | 460/10,597 |  |
| Multivariable modelc | 1.00 (-) | 0.97 (0.82, 1.14) | 0.92 (0.81, 1.05) | 0.86 (0.75, 0.99) | 0.05 |
| **Fish, median (servings/wk)** | 0.6 | 1.1 | 1.6 | 2.6 |  |
| PCSM |  |  |  |  |  |
| Deaths/person years | 66/7,704 | 65/8,783 | 59/9,093 | 67/9,428 |  |
| Multivariable modelc | 1.00 (-) | 0.91 (0.63, 1.30) | 0.79 (0.54, 1.15) | 0.84 (0.57, 1.23) | 0.34 |
| All-cause mortality |  |  |  |  |  |
| Deaths/person years | 425/7,704 | 416/8,783 | 423/9,093 | 445/9,428 |  |
| Multivariable modelc | 1.00 (-) | 0.91 (0.79, 1.05) | 0.92 (0.80, 1.06) | 0.96 (0.82, 1.11) | 0.74 |
| **Eggs, median (servings/wk)** | 0.1 | 0.5 | 1.0 | 3.0 |  |
| PCSM |  |  |  |  |  |
| Deaths/person years | 27/4,626 | 47/6,634 | 51/7,372 | 132/16,376 |  |
| Multivariable modelc | 1.00 (-) | 1.23 (0.75, 2.01) | 1.15 (0.70, 1.89) | 1.28 (0.81, 2.03) | 0.4 |
| All-cause mortality |  |  |  |  |  |
| Deaths/person years | 200/4,626 | 306/6,634 | 347/7,372 | 856/16,376 |  |
| Multivariable modelc | 1.00 (-) | 1.05 (0.87, 1.27) | 0.99 (0.82, 1.20) | 1.09 (0.91, 1.30) | 0.21 |

a CPS = Cancer Prevention Study; HR = hazard ratio; CI = confidence interval.

b Quartile ranges in 1999 were <2.9, 2.9-<4.6, 4.6-<7.4, ≥7.4 servings/wk for red/processed meat; <1.6, 1.6-<2.5, 2.5-<3.9, ≥3.9 servings/wk for unprocessed red meat; <0.9, 0.9-<1.8, 1.8-<3.5, ≥3.5 servings/wk for processed meat; <1, 1-<1.5, 1.5-<2.5, ≥2.5 servings/wk for poultry; <0.6, 0.6-<1.0, 1.0-<1.5, ≥1.5 for unprocessed poultry; <0.9, 0.9-<1.4, 1.4-<2.1, ≥2.1 servings/wk for fish; <0.5, 0.5-<1, 1-<3, ≥3 servings/wk for eggs. Quartile ranges in 2003 were <3.1, 3.1-<4.8, 4.8-<7.4, ≥7.4 servings/wk for red/processed meat; <1.7, 1.7-<2.7, 2.7-<3.9, ≥3.9 servings/wk for unprocessed red meat; <1.0, 1.0-<1.8, 1.8-<3.4, ≥3.4 servings/wk for processed meat; <1, 1-<1.5, 1.5-<3.2, ≥3.2 servings/wk for poultry; <0.6, 0.6-<1.0, 1.0-<1.5, ≥1.5 for unprocessed poultry; <0.8, 0.8-<1.4, 1.4-<2.0, ≥2.0 servings/wk for fish; <0.5, 0.5-<1, 1-<3, ≥3 servings/wk for eggs.

c Adjusted for age at diagnosis, calendar year of diagnosis, tumor extent, Gleason score, nodal involvement, treatment, education, family history of prostate cancer, pre-diagnosis history of prostate-specific antigen testing, body mass index, smoking status, physical activity, history of diabetes, and other cancer, total fruit and vegetable intake, and energy intake. All exposures were adjusted for one another; red and processed meats were mutually adjusted.
