# Supplementary material for: Red and Processed Meat, Poultry, Fish, and Egg Intakes and Cause-Specific and All-Cause Mortality among Men with Nonmetastatic Prostate Cancer in a U.S. Cohort
Source: Oxford University Press journal article supplement (doi:10.1158/1055-9965.epi-19-1426), 2020-03-04
Supplement: 10559965epi191426-sup-232373_2_supp_6065421_q54fpb.docx [file 10559965epi191426-sup-232373_2_supp_6065421_q54fpb.docx]

| **Supplemental Table 1. Line items of red meat, processed meat, poultry, fish and eggs on all FFQs** | | | |
| --- | --- | --- | --- |
|  | **1992** | **1999** | **2003** | |
| **Unprocessed Red meat** |  |  |  | |
| Beef | Beef steaks, roasts, including on sandwiches | Beef or lamb as a main dish (steak or roast) | Beef, pork, or lamb roast | |
| Beef steak | |
| Beef, other | Beef stew or pot pie | Beef, pork, or lamb as a sandwich or mixed dish (stew, casserole, lasagna) | Beef, pork, or lamb as sandwich or in a stew, casserole, lasagna, frozen dinner, etc. | |
| Pork | Pork, including chops, roast | Pork as a main dish (eg, ham or chops) | Pork chops | |
| Baked ham | |
| Hamburger | Hamburgers, cheeseburger, meatloaf, casserole with ground beef | Hamburger, regular | Hamburger, regular | |
| Hamburger, lean or extra-lean | Hamburger, lean or extra-lean | |
| **Processed meat** |  |  |  | |
| Hot dogs | Hot dogs | Beef or pork hot dogs | Beef or pork hot dogs | |
| Chicken or turkey hot dogs | Chicken or turkey hot dogs | |
| Lunch meat | Ham, bologna, salami, lunchmeat | Salami, bologna, or other processed meat sandwiches | Salami, bologna, or other processed meat sandwiches | |
| Other meat sandwiches |  |  |  | |
| Sausage | Sausage | Sausage, kielbasa | Sausage, kielbasa | |
| Bacon | Bacon | Bacon | Bacon | |
| **Fish** |  |  |  | |
| Tuna | Tuna, tuna salad, tuna casserole | Canned tuna fish |  | |
| Other fish | Fried fish or fish sandwich | Dark meat fish, mackerel, salmon, sardines, blue fish, swordfish | Dark meat fish, mackerel, salmon, sardines, blue fish, swordfish | |
| Breaded fish cakes |  | |
| Other fish broiled or baked | Other fish, cod, haddock, halibut | Other fish, cod, haddock, halibut | |
| Other seafood | NA | Shrimp, lobster, scallops, or clams as a main dish | Shrimp, lobster, scallops, or clams as a main dish | |
| **Poultry** |  |  |  | |
| Chicken or turkey | Chicken or turkey roasted, stewed, broiled, ground, including sandwiches | Chicken or turkey sandwiches | Chicken or turkey in sandwiches or in frozen dinner | |
| Other chicken or turkey with skin | Other chicken or turkey with skin | |
| Other chicken or turkey without skin | Other chicken or turkey without skin | |
|  | Fried chicken |  |  | |
| **Eggs** |  |  |  | |
| Eggs | Eggs | Eggs, including yolk | Eggs, including yolk | |
